# Supplementary material for: Microbiota-dependent interferon-λ controls immunity of the uterus and maternal-fetal interface
Source: Research Square preprint supplement (doi:10.21203/rs.3.rs-9898550/v1), 2026-06-03
Supplement: Supplementary file 1 [file 9b7d3e78e80c2251b78006e0.docx]

**Supplementary Information**

**Microbiota-dependent interferon-λ controls immunity of the uterus and maternal-fetal interface.**

**Authors:** Elisha Segrist, Anne Roman, Eduard Ansaldo, Juliana Perez Chaparro, Colton McNinch, Derron A Alves, Kevin Bock, Irini Sereti, Yasmine Belkaid

**Contents:**

Supplementary Figures 1-6

Supplementary Tables 1-2

**
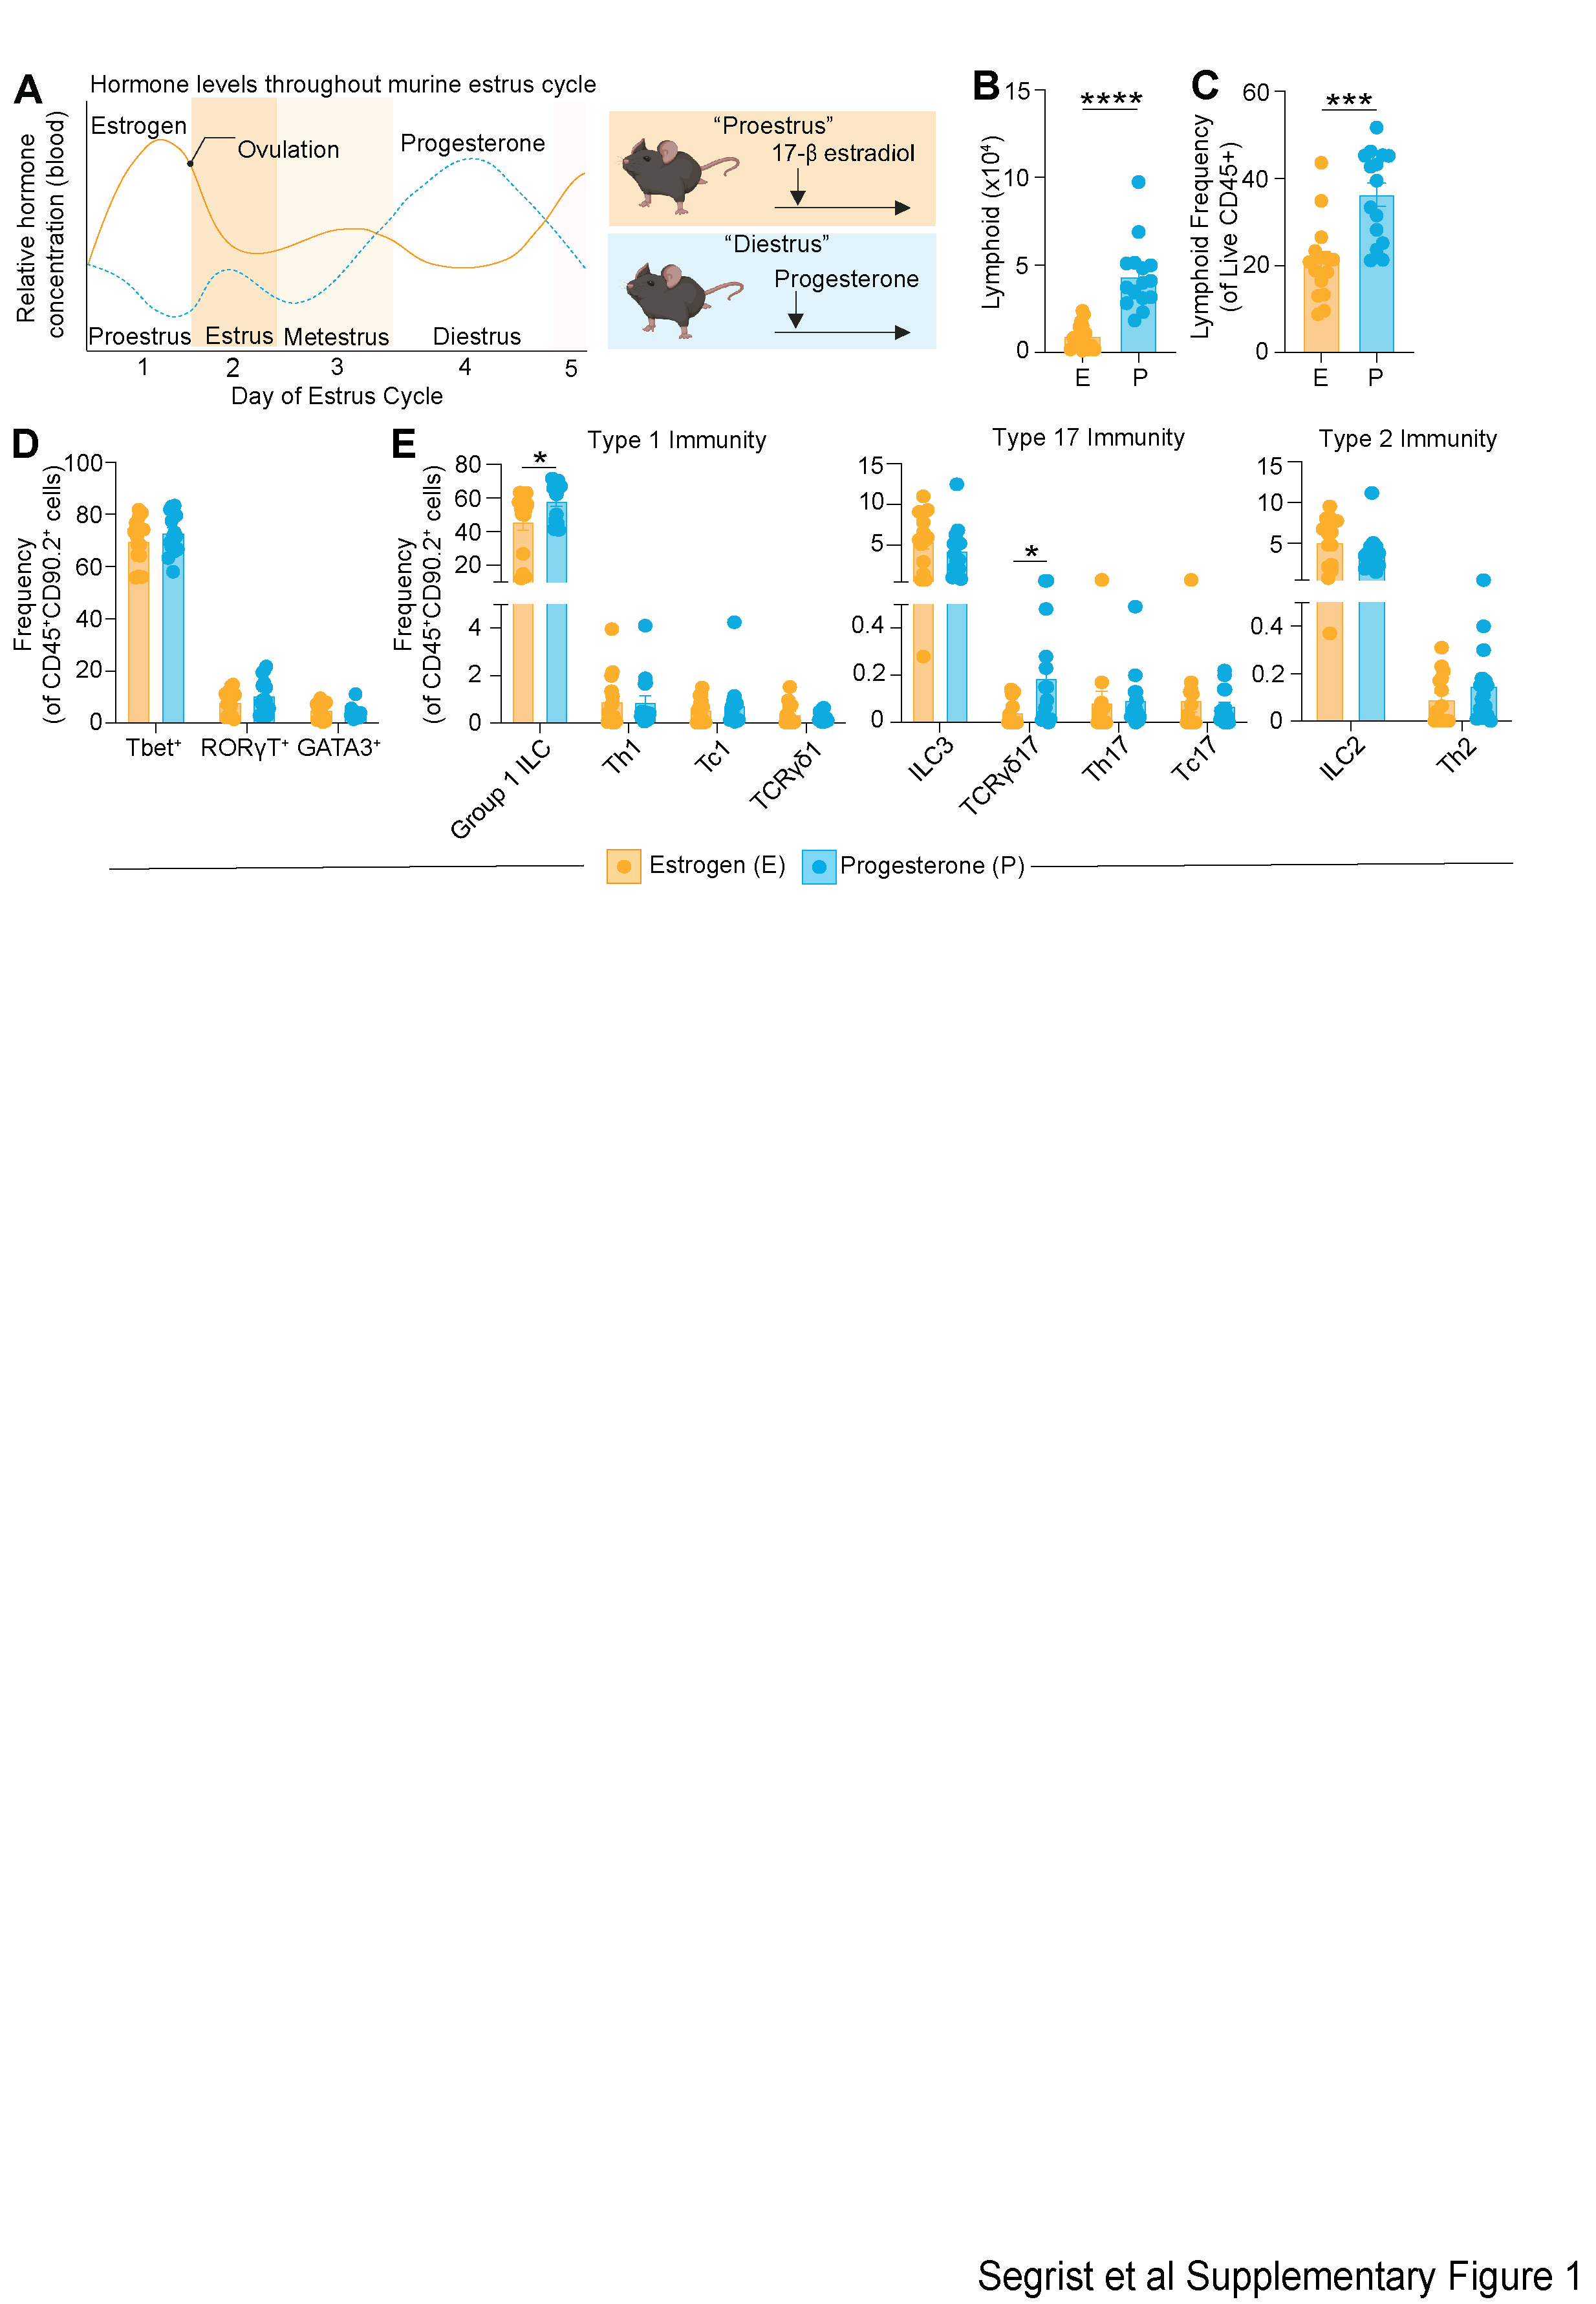
**

**Supplementary Figure 1. Sex hormones alter uterine immunity.**

(**A**) Schematic of the mouse estrus cycle adapted from a BioRender.com template and Walmer *et al.* (**B, C**) Quantification of absolute cell number and cell frequency (of Live CD45+) of lymphoid cells from uteri of mice treated with estrogen (E, orange) or progesterone (P, blue). (**D**) Quantification of cell frequency (of CD45+CD90.2+) of Tbet+, RORγT+, or GATA3+ lymphoid cells from mice treated with estrogen or progesterone.

(**E**) Quantification of cell frequency (of CD45+CD90.2+) of the indicated cell types. (**B-E**) Each dot represents a uterus taken from an individual mouse with mean ± SEM from at least three biological replicates. Significance was determined by an unpaired Student’s t-test. * denote p-val<0.05 *** denote p-val<0.001 **** denote p-val<0.0001.

**
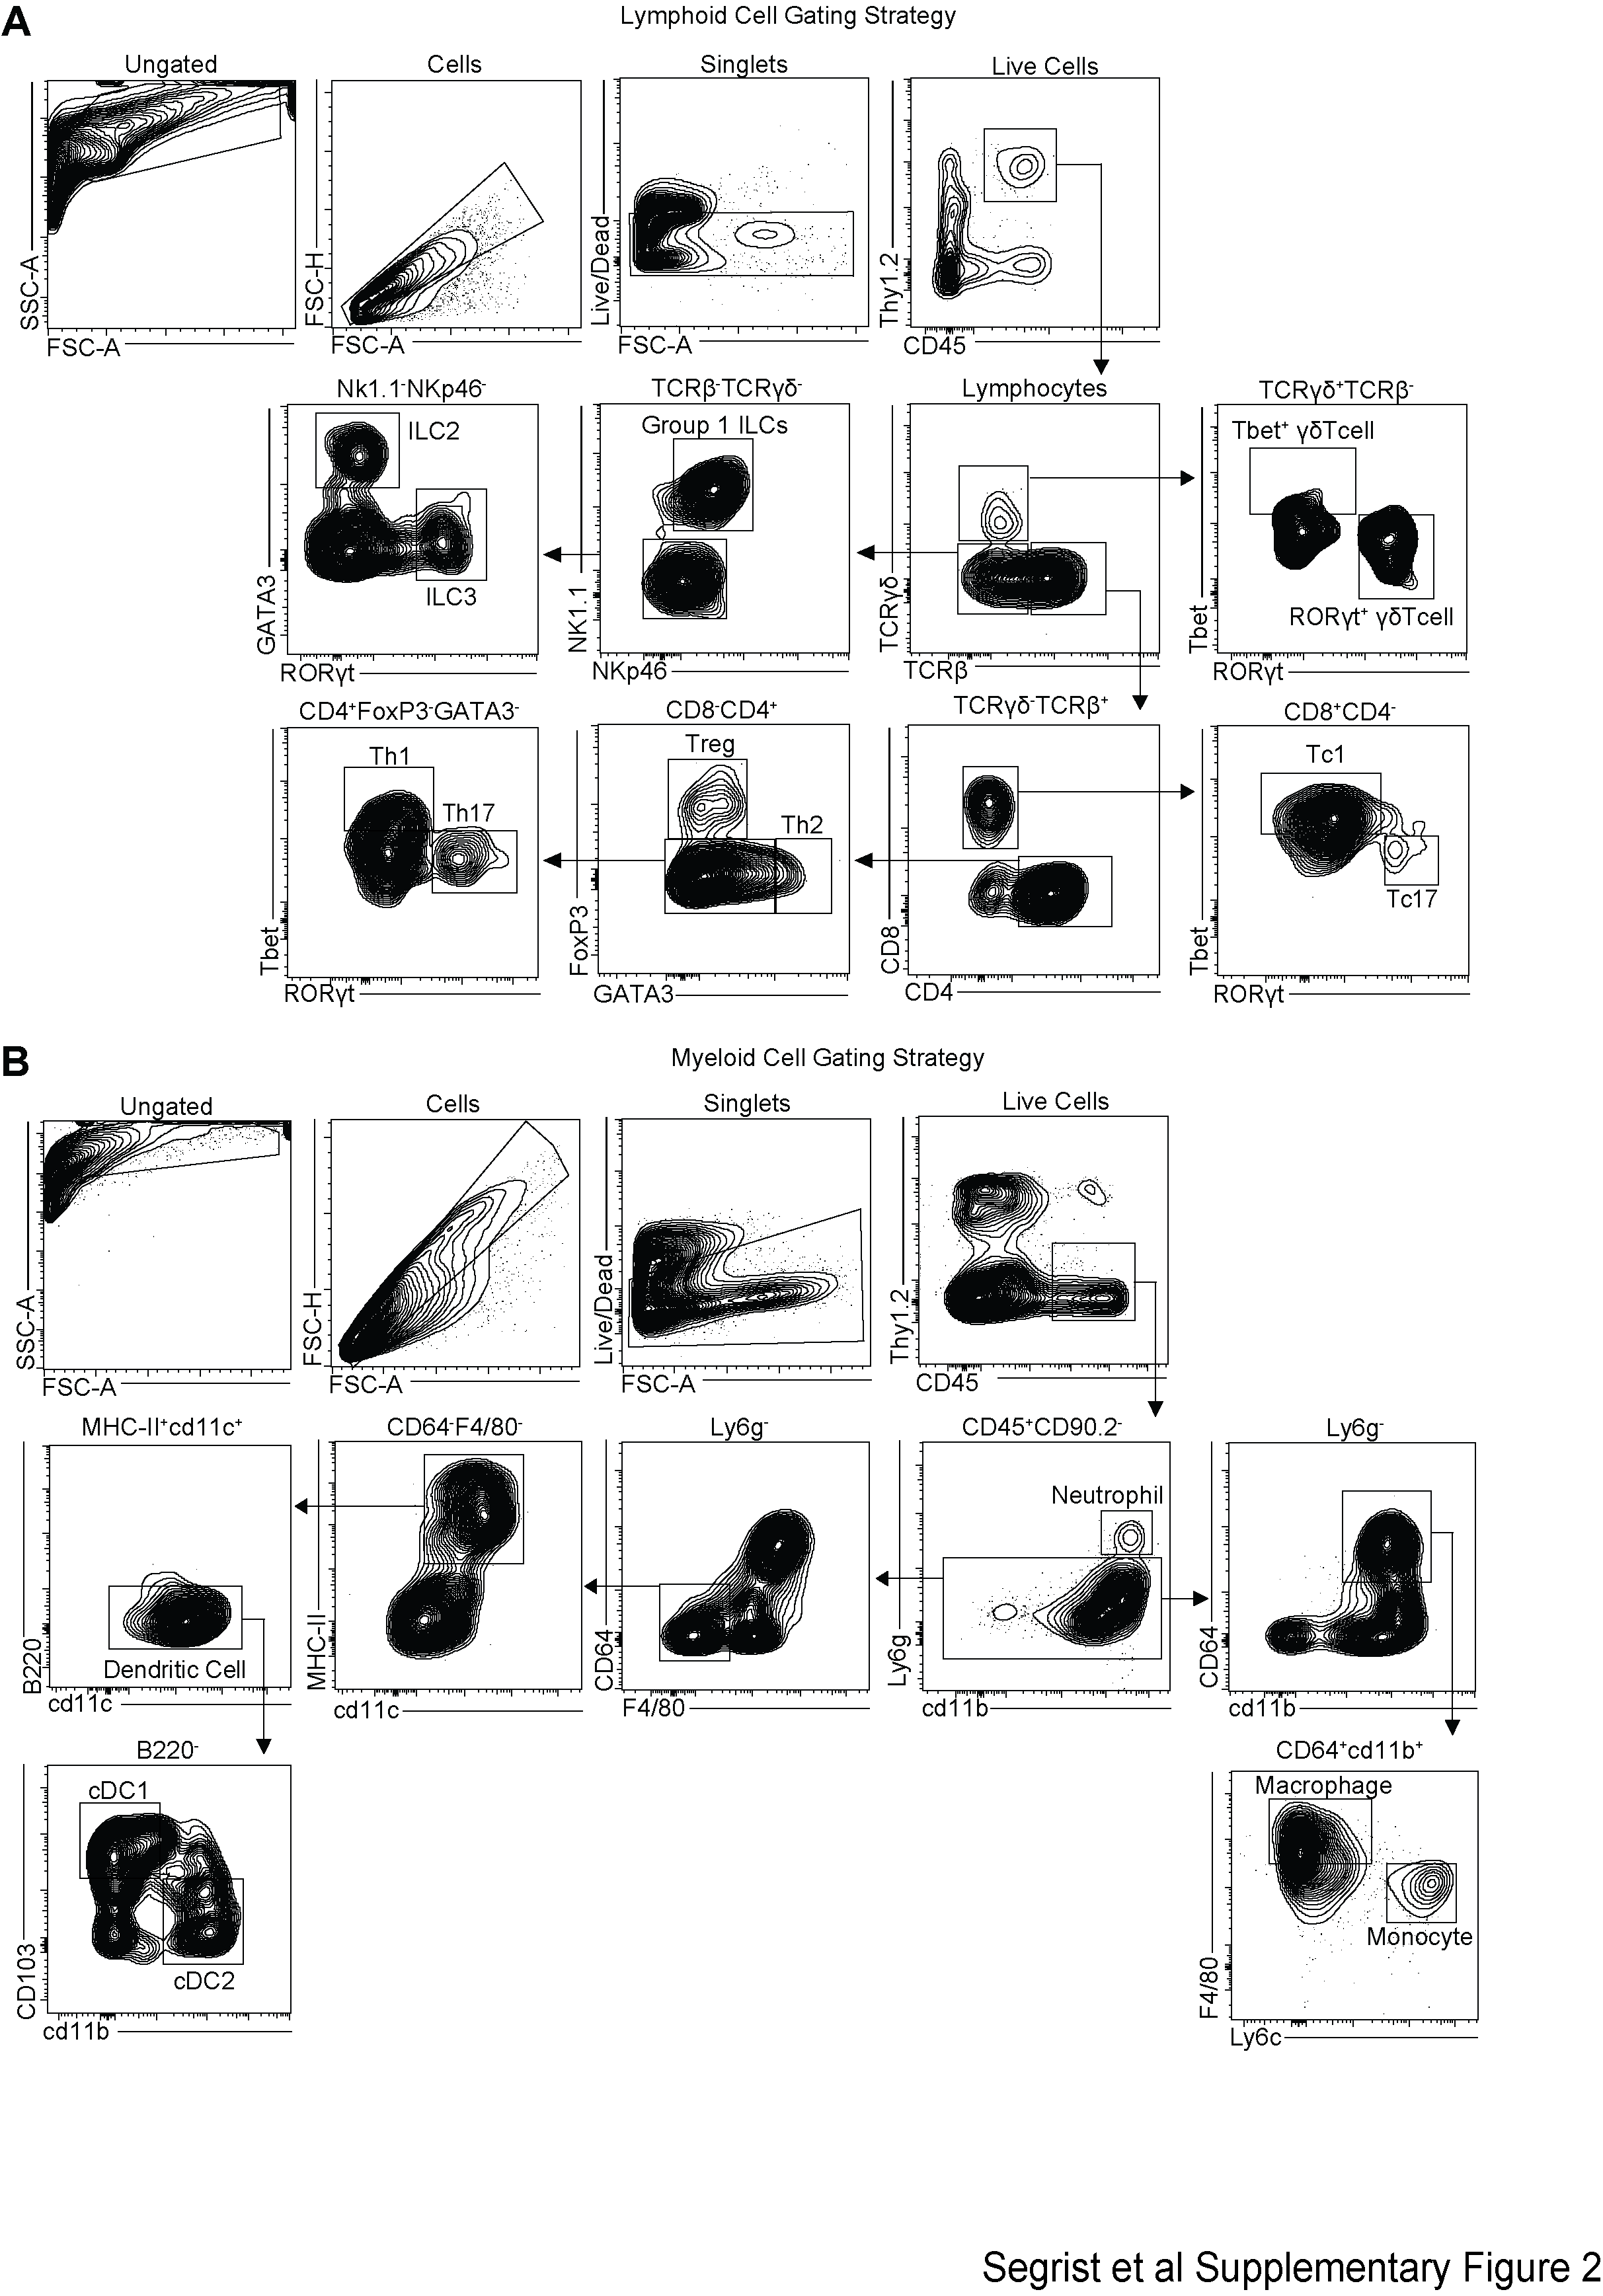
**

**Supplementary Figure 2. Lymphocyte and myeloid gating strategy.**

(**A, B**) Representative FACS plot showing (**A**) lymphoid and (**B**) myeloid gating strategy.

**
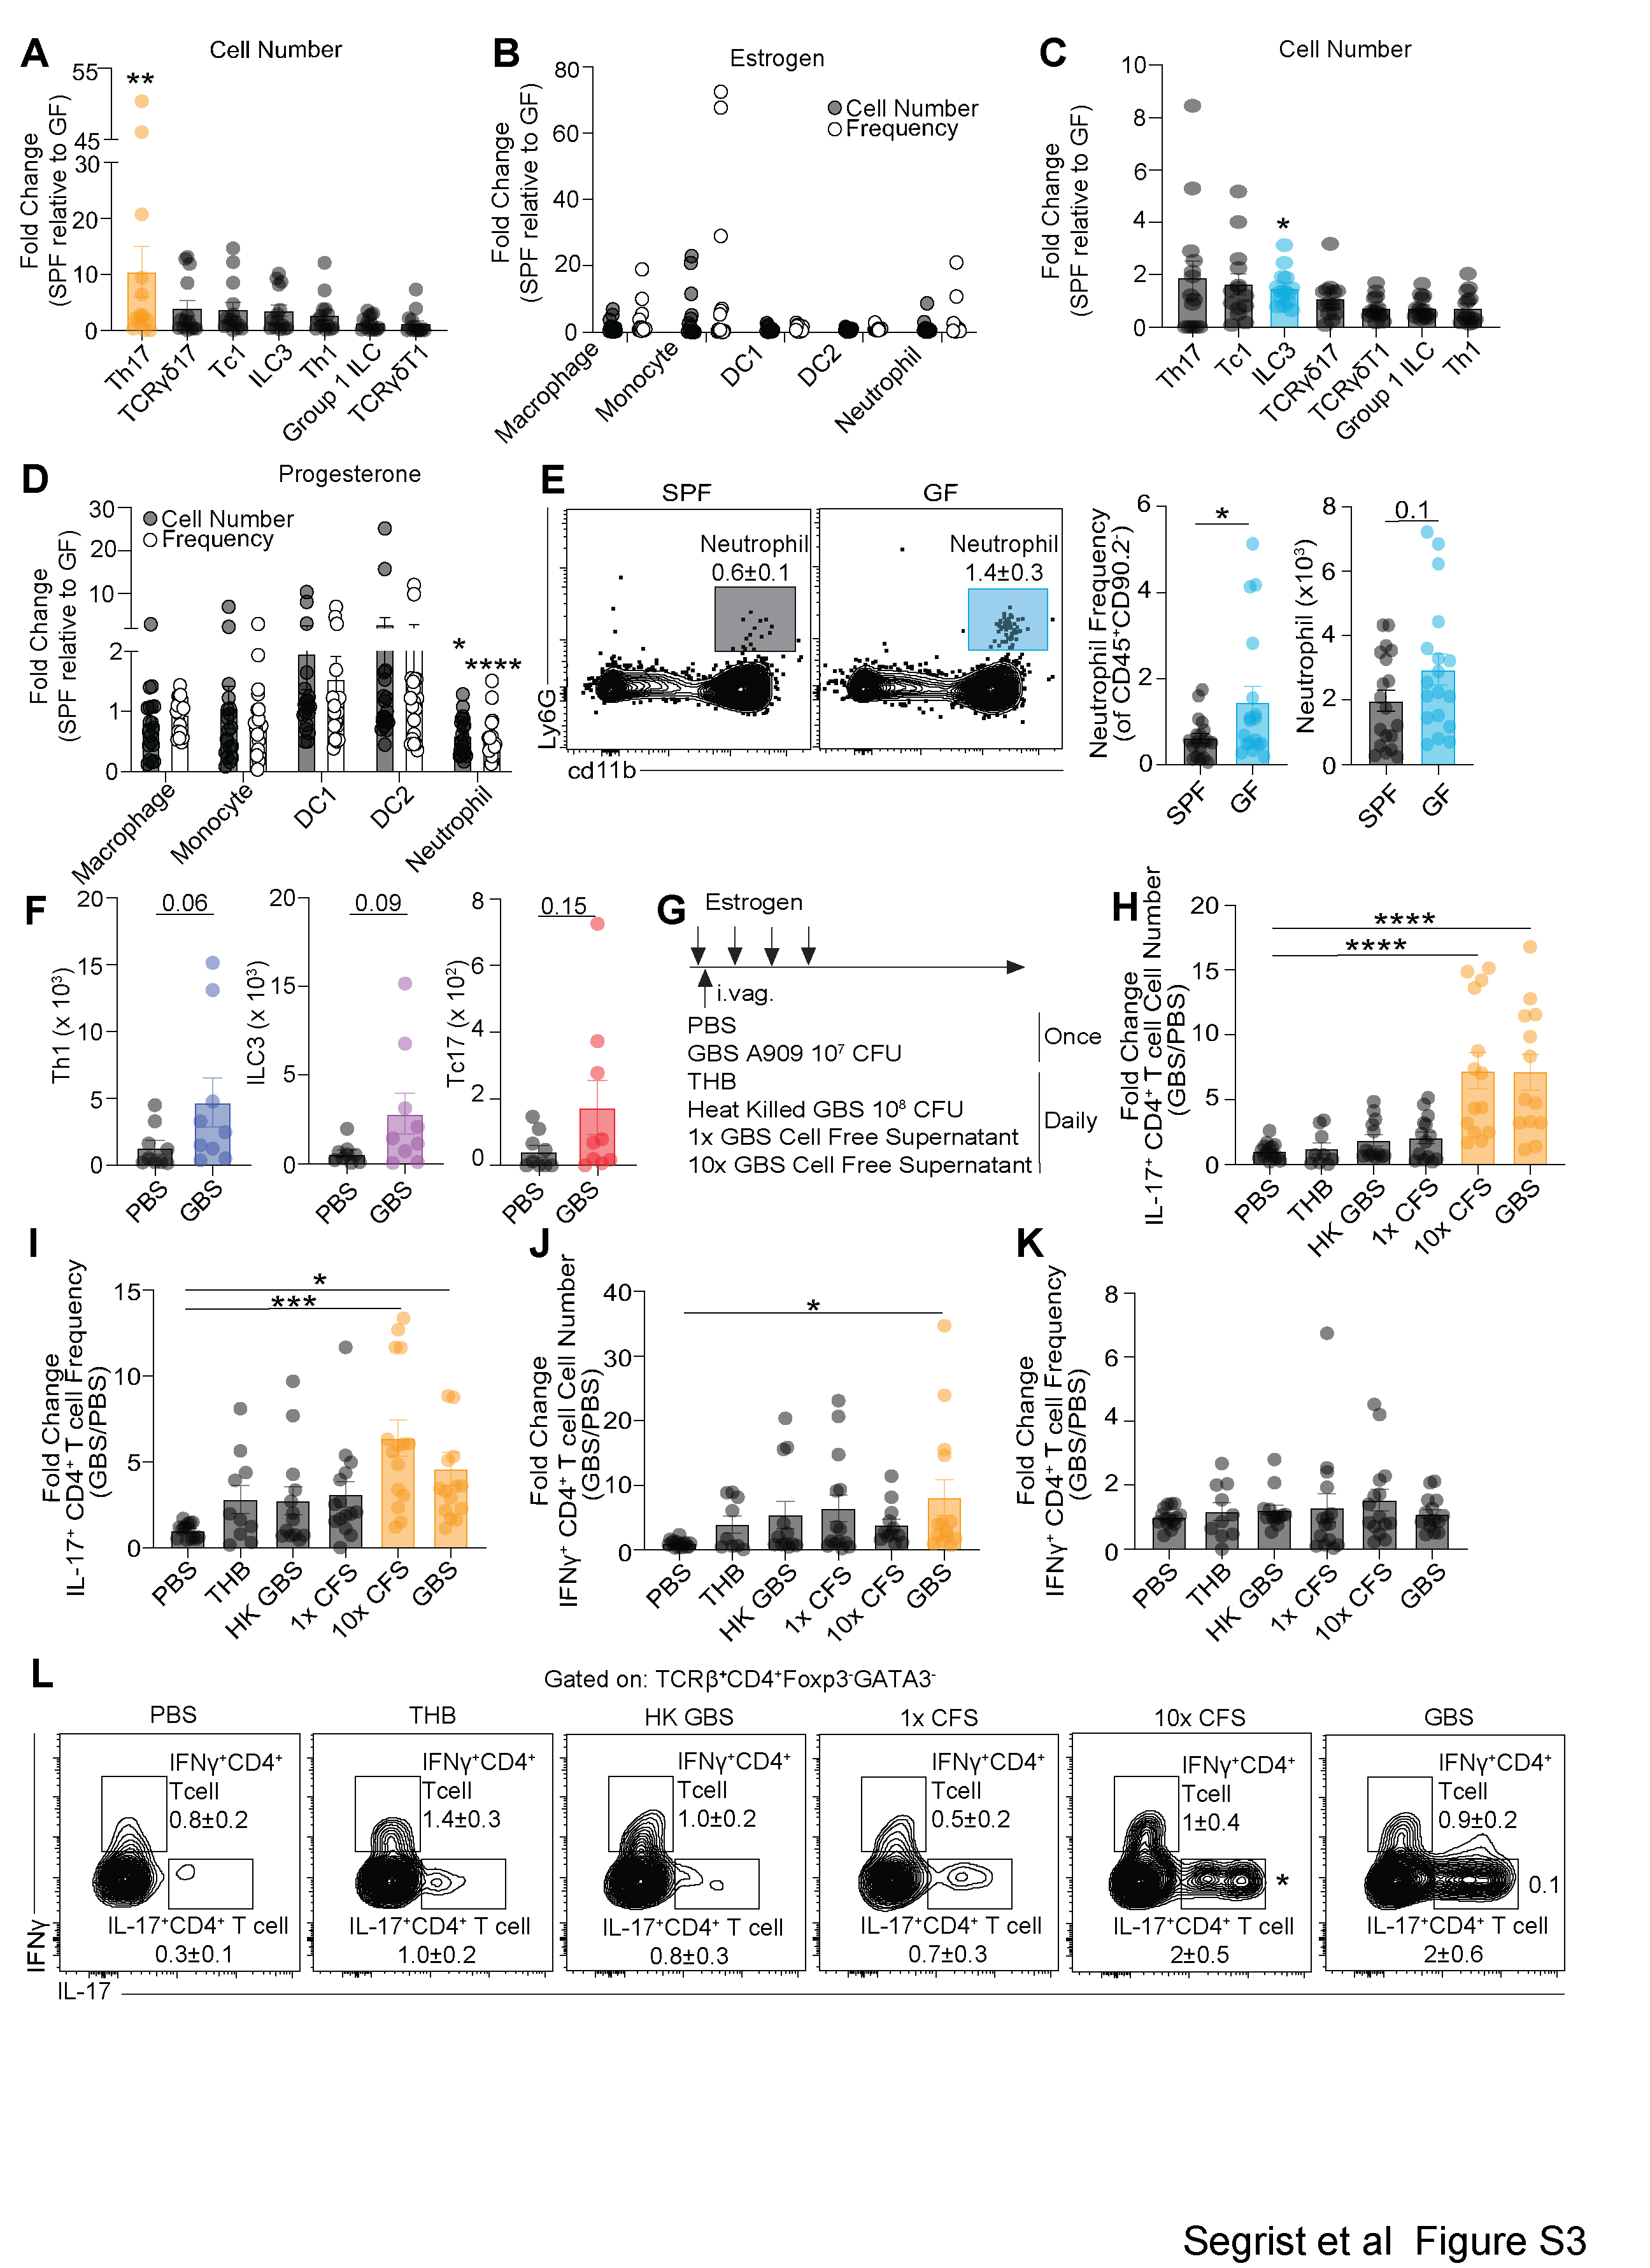
**

**Supplementary Figure 3. Secreted bacterial products are sufficient to induce uterine type 17 immunity.**

(**A, C**) Quantification of type 1 and type 17 immune cells as fold change of absolute cell number in SPF animals compared to GF animals during (**A**) estrogen or (**C**) progesterone treatment. (**B, D**) Quantification of the indicated myeloid cell as fold change of absolute cell number and cell frequency (of CD45+CD90.2+ cells) in SPF animals compared to GF animals during (**B**) estrogen or (**D**) progesterone treatment. (**E**) Left, representative FACS plots showing frequency of neutrophils in SPF and GF animals treated with progesterone. Right, quantification of absolute neutrophil cell number and frequency in SPF and GF animals treated with progesterone. (**F**) Quantification of absolute cell number of Th1, ILC3, and Tc17 cells. (**G**) Experimental schematic showing one time administration of live GBS and daily administration of heat killed GBS, 1x GBS spent media, 10x GBS spent media, and bacterial growth media (THB). Lymphoid cells underwent in vitro stimulation to detect cytokine expression. (**H-K**) Quantification of (**H,I**) IL-17+ and (**J,K**) IFNγ+ CD4+ T cells abundance as fold change in absolute cell number and frequency (of CD45+CD90.2+ cells) in GBS treated animals relative to mock treated animals. (**L**) Representative FACS plots displaying frequency of uterine IFNγ+ or IL-17+ CD4+ T cells at 21 dpa. (**A-K**) Each dot represents one uterus from an individual mouse from at least (**A-E**) three or (**F-L**) two biological replicates with mean with ± SEM. Significance determined by an (**A-D, F**) unpaired Student’s t-test or (**H-L**) one-way ANOVA with multiple comparisons. * denote p-val<0.05 ** denote p-val<0.01 ***denote p-val<0.001 **** denote p-val<0.0001.


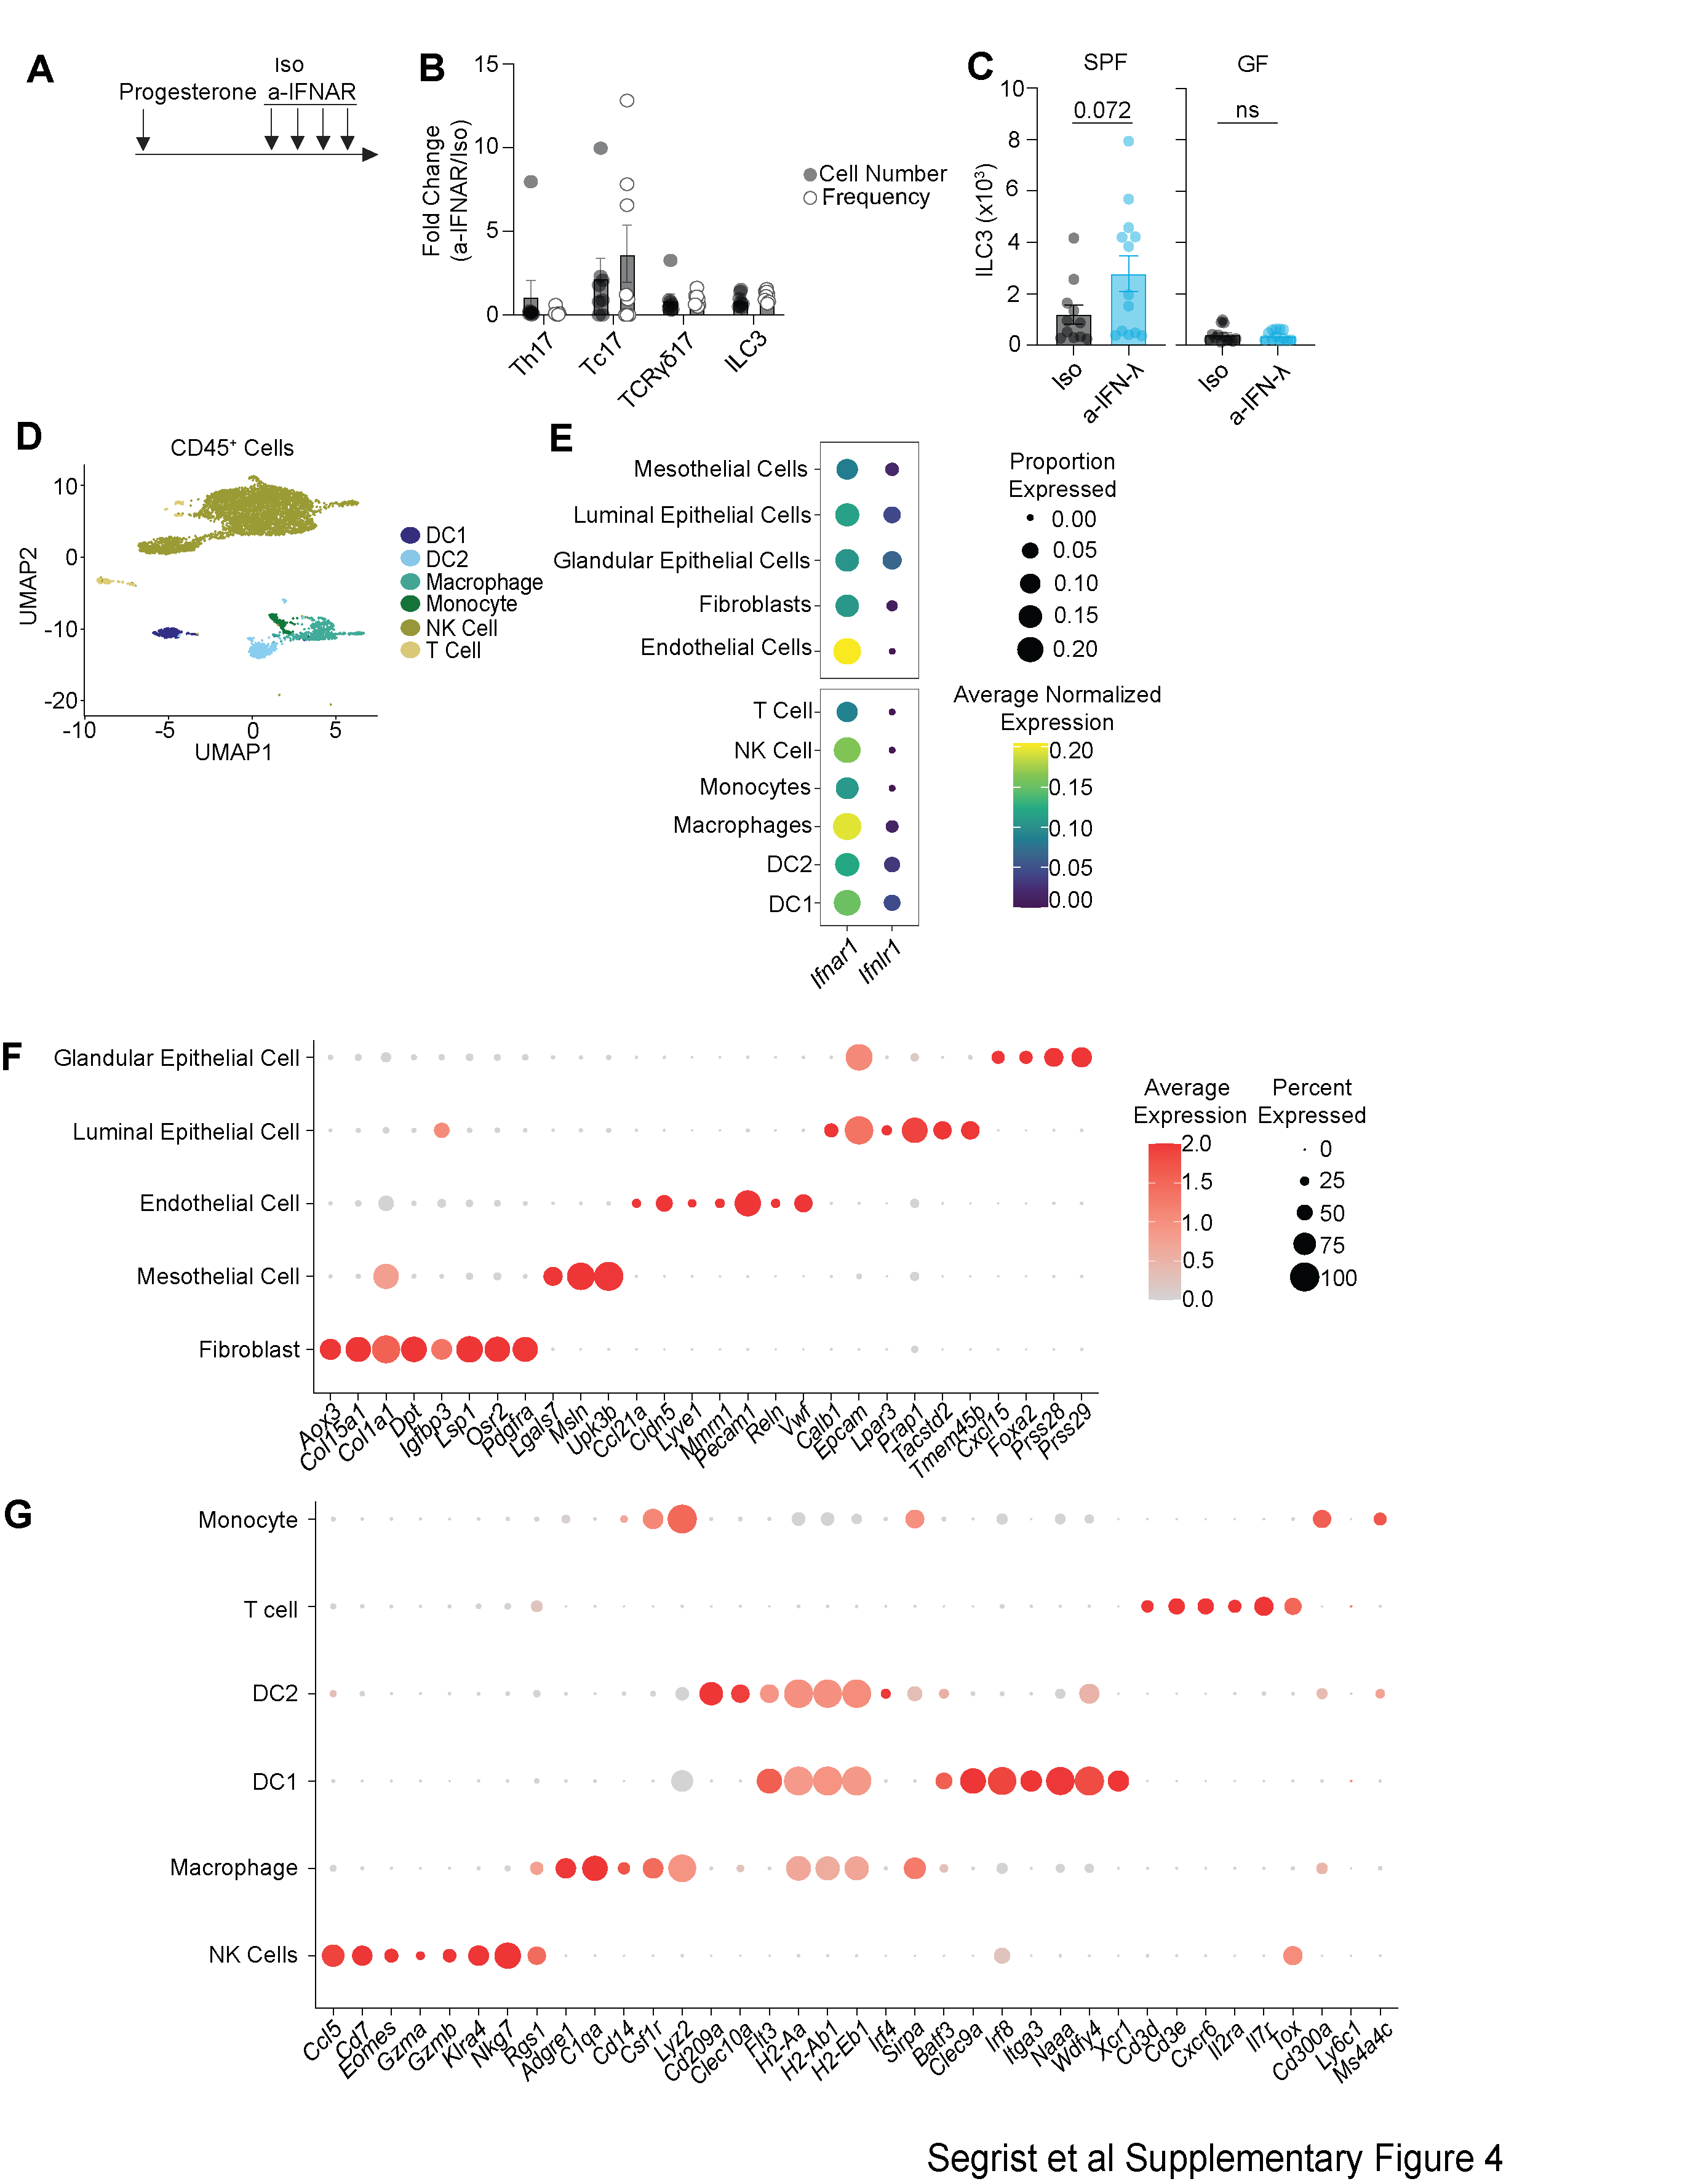


**Supplementary Figure 4. IFNLR expression occurs primarily in uterine epithelial cells.**

(**A**) Experimental schematic depicting isotype control (Iso) or anti-IFNAR neutralizing antibody (a-IFNAR) treatment following progesterone treatment of SPF mice. (**B**) Quantification of indicated lymphoid cell types as fold change of absolute cell number and cell frequency (of CD45+CD90.2+ cells) in animals treated with a-IFNAR compared to Iso treated animals. (**C**) Quantification of uterine ILC3 absolute cell number in SPF and GF animals treated with progesterone and Iso or a-IFN-λ. (**A-C**) Each dot represents a uterus taken from an individual mouse from three biological replicates with mean ± SEM. Significance was determined by an unpaired Student’s t-test. (**D**) UMAP projection of CD45+ cells sorted from WT and IFNLR KO uteri. (**E**) Dot plot showing expression of *Ifnar1* or *Ifnlr* in WT cells from the EpCam+ and CD45+ libraries. (**F, G**) Dot plot showing marker gene expression for each cell type from the (**F**) EpCam+ or (**G**) CD45+ library.

**
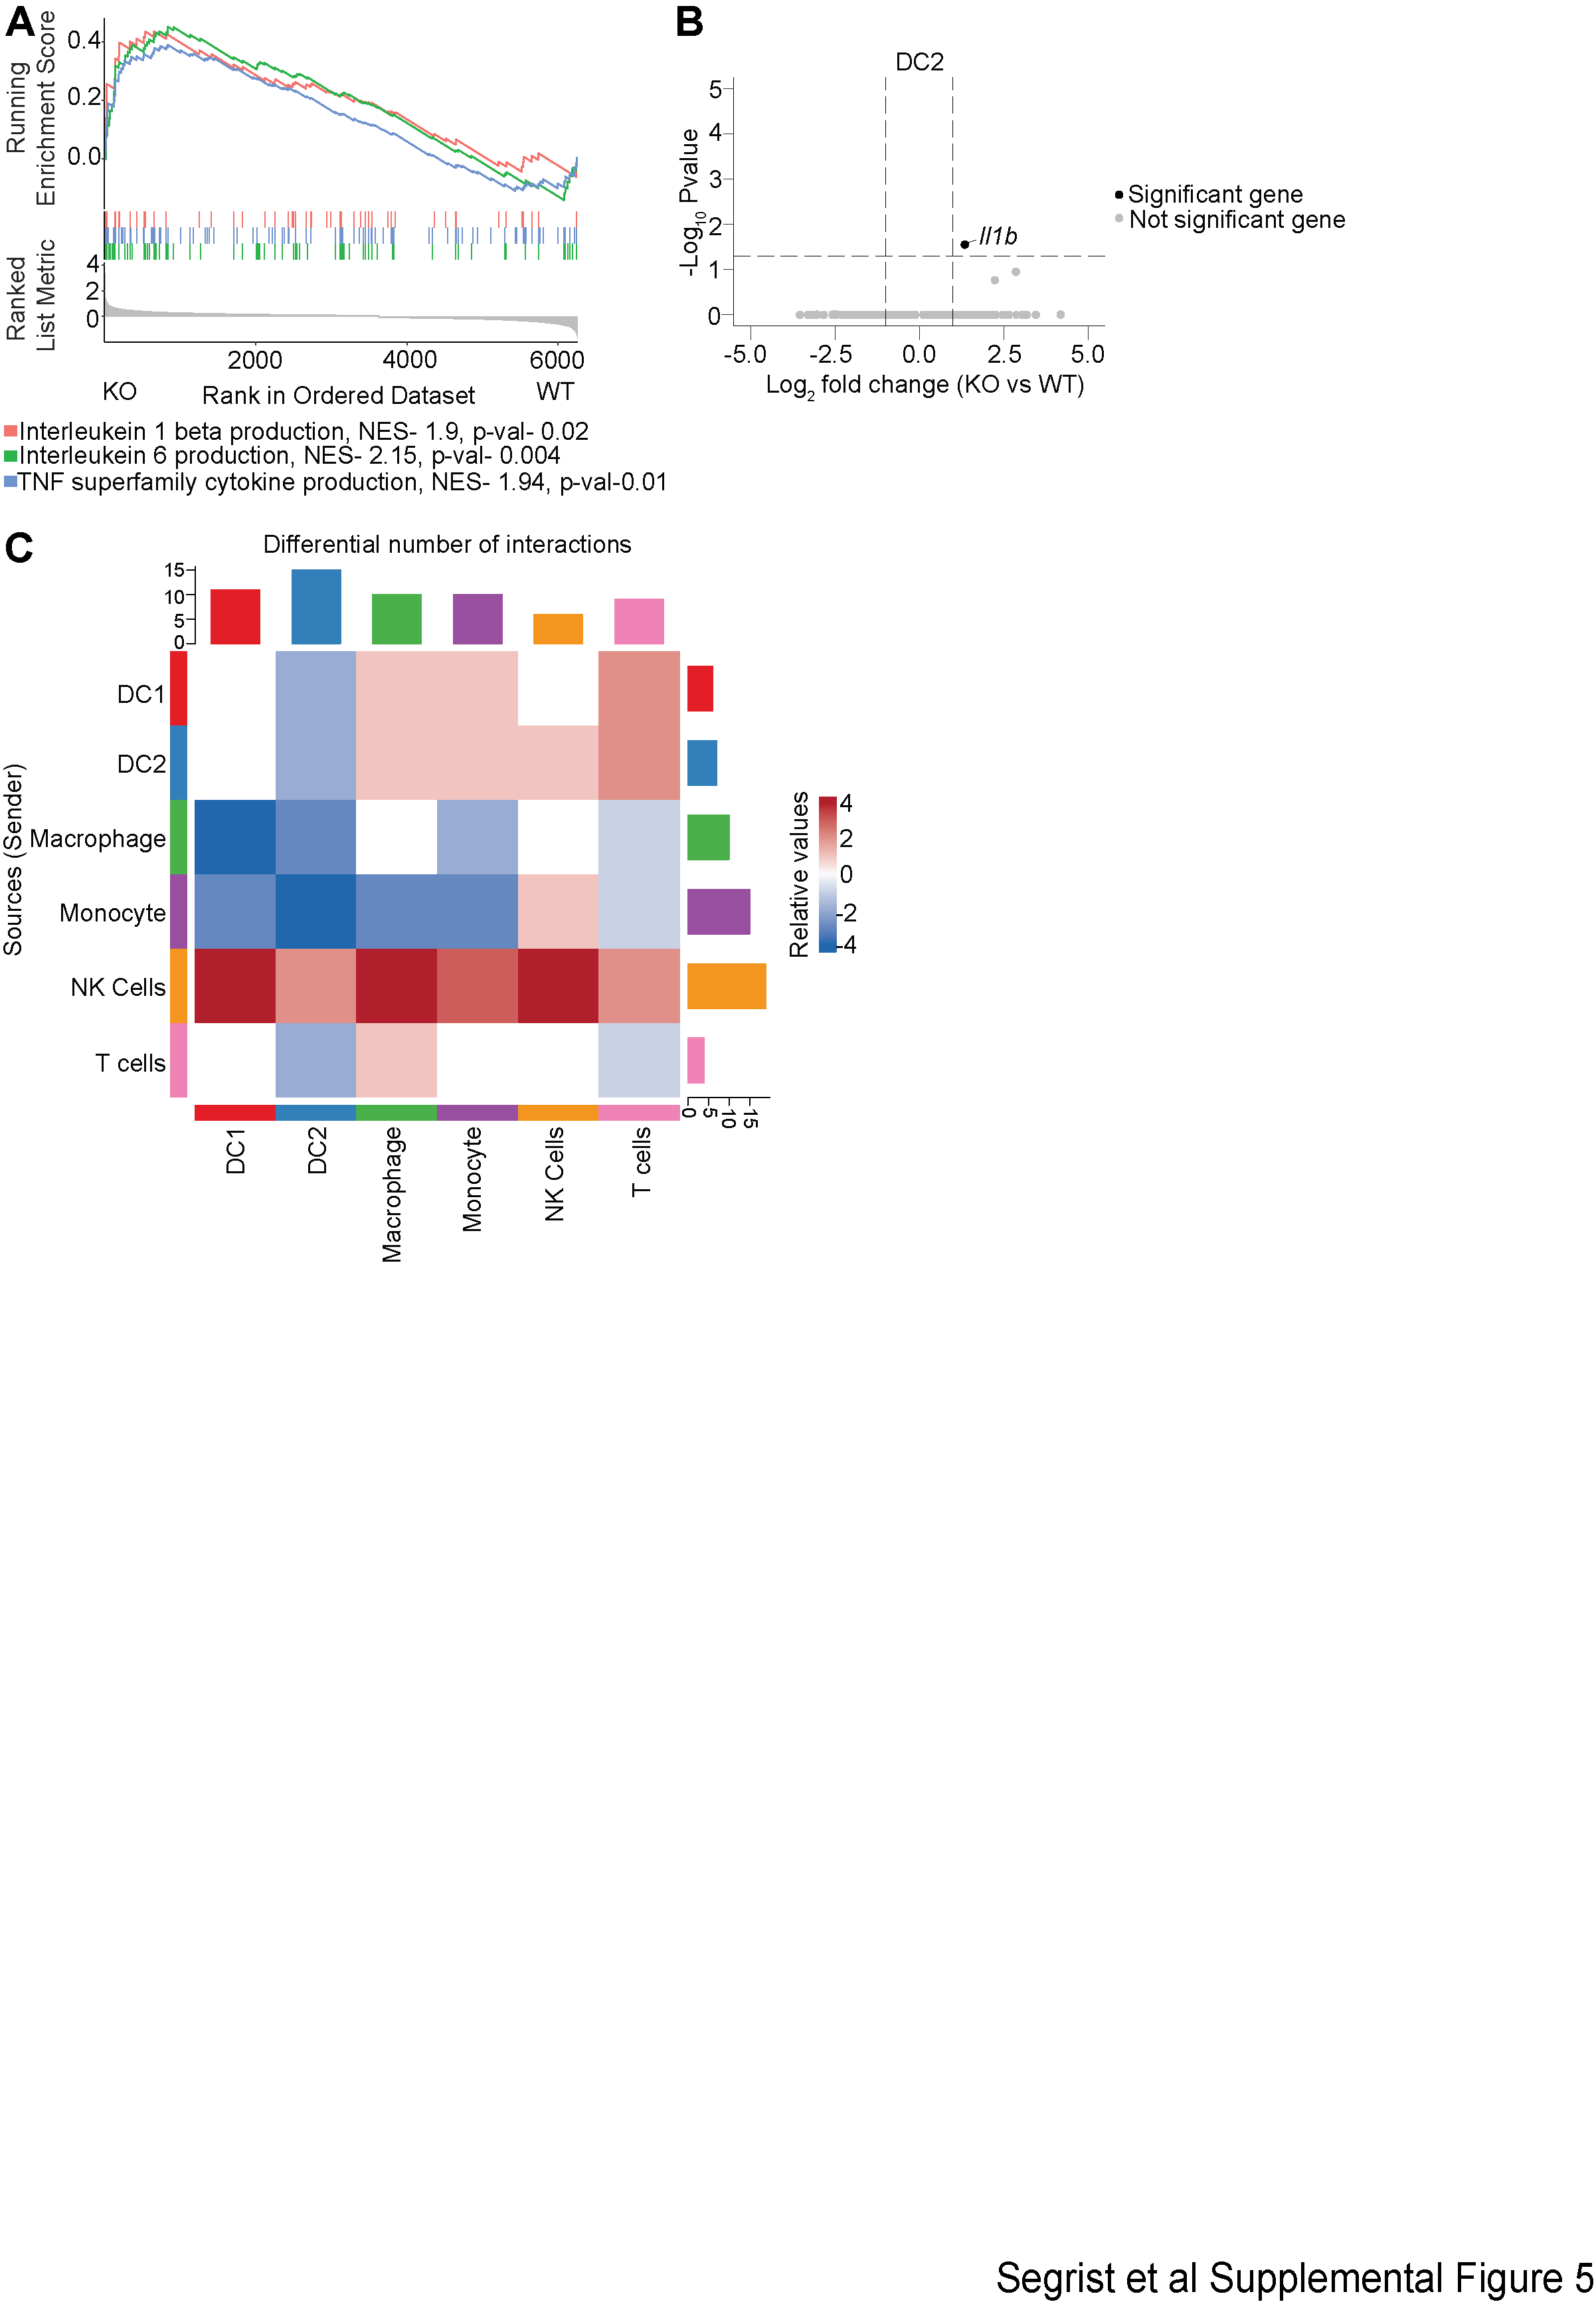
**

**Supplementary Figure 5. Loss of IFNLR enhanced expression of cytokines that promote type 17 immunity.**

(**A**) GSEA enrichment plots for IL-6, IL-1B, and TNF family cytokine production pathways enriched in all CD45+ cells from IFNLR KO uteri compared to WT. (**B**) Volcano plot displaying differentially expressed genes from the primary uterine DC2 cell cluster. (**C**) Heatmap depicting the differential number of IFNLR KO ligand-receptor interactions relative to WT control across all CD45+ cells. Bar heigh represents the degree of change in terms of the number of interactions between IFNLR KO and WT uteri. The top bar represents the sum of each column (incoming signaling:receiver) and the right bar represents the sum of each row (outgoing signaling:sender).

**
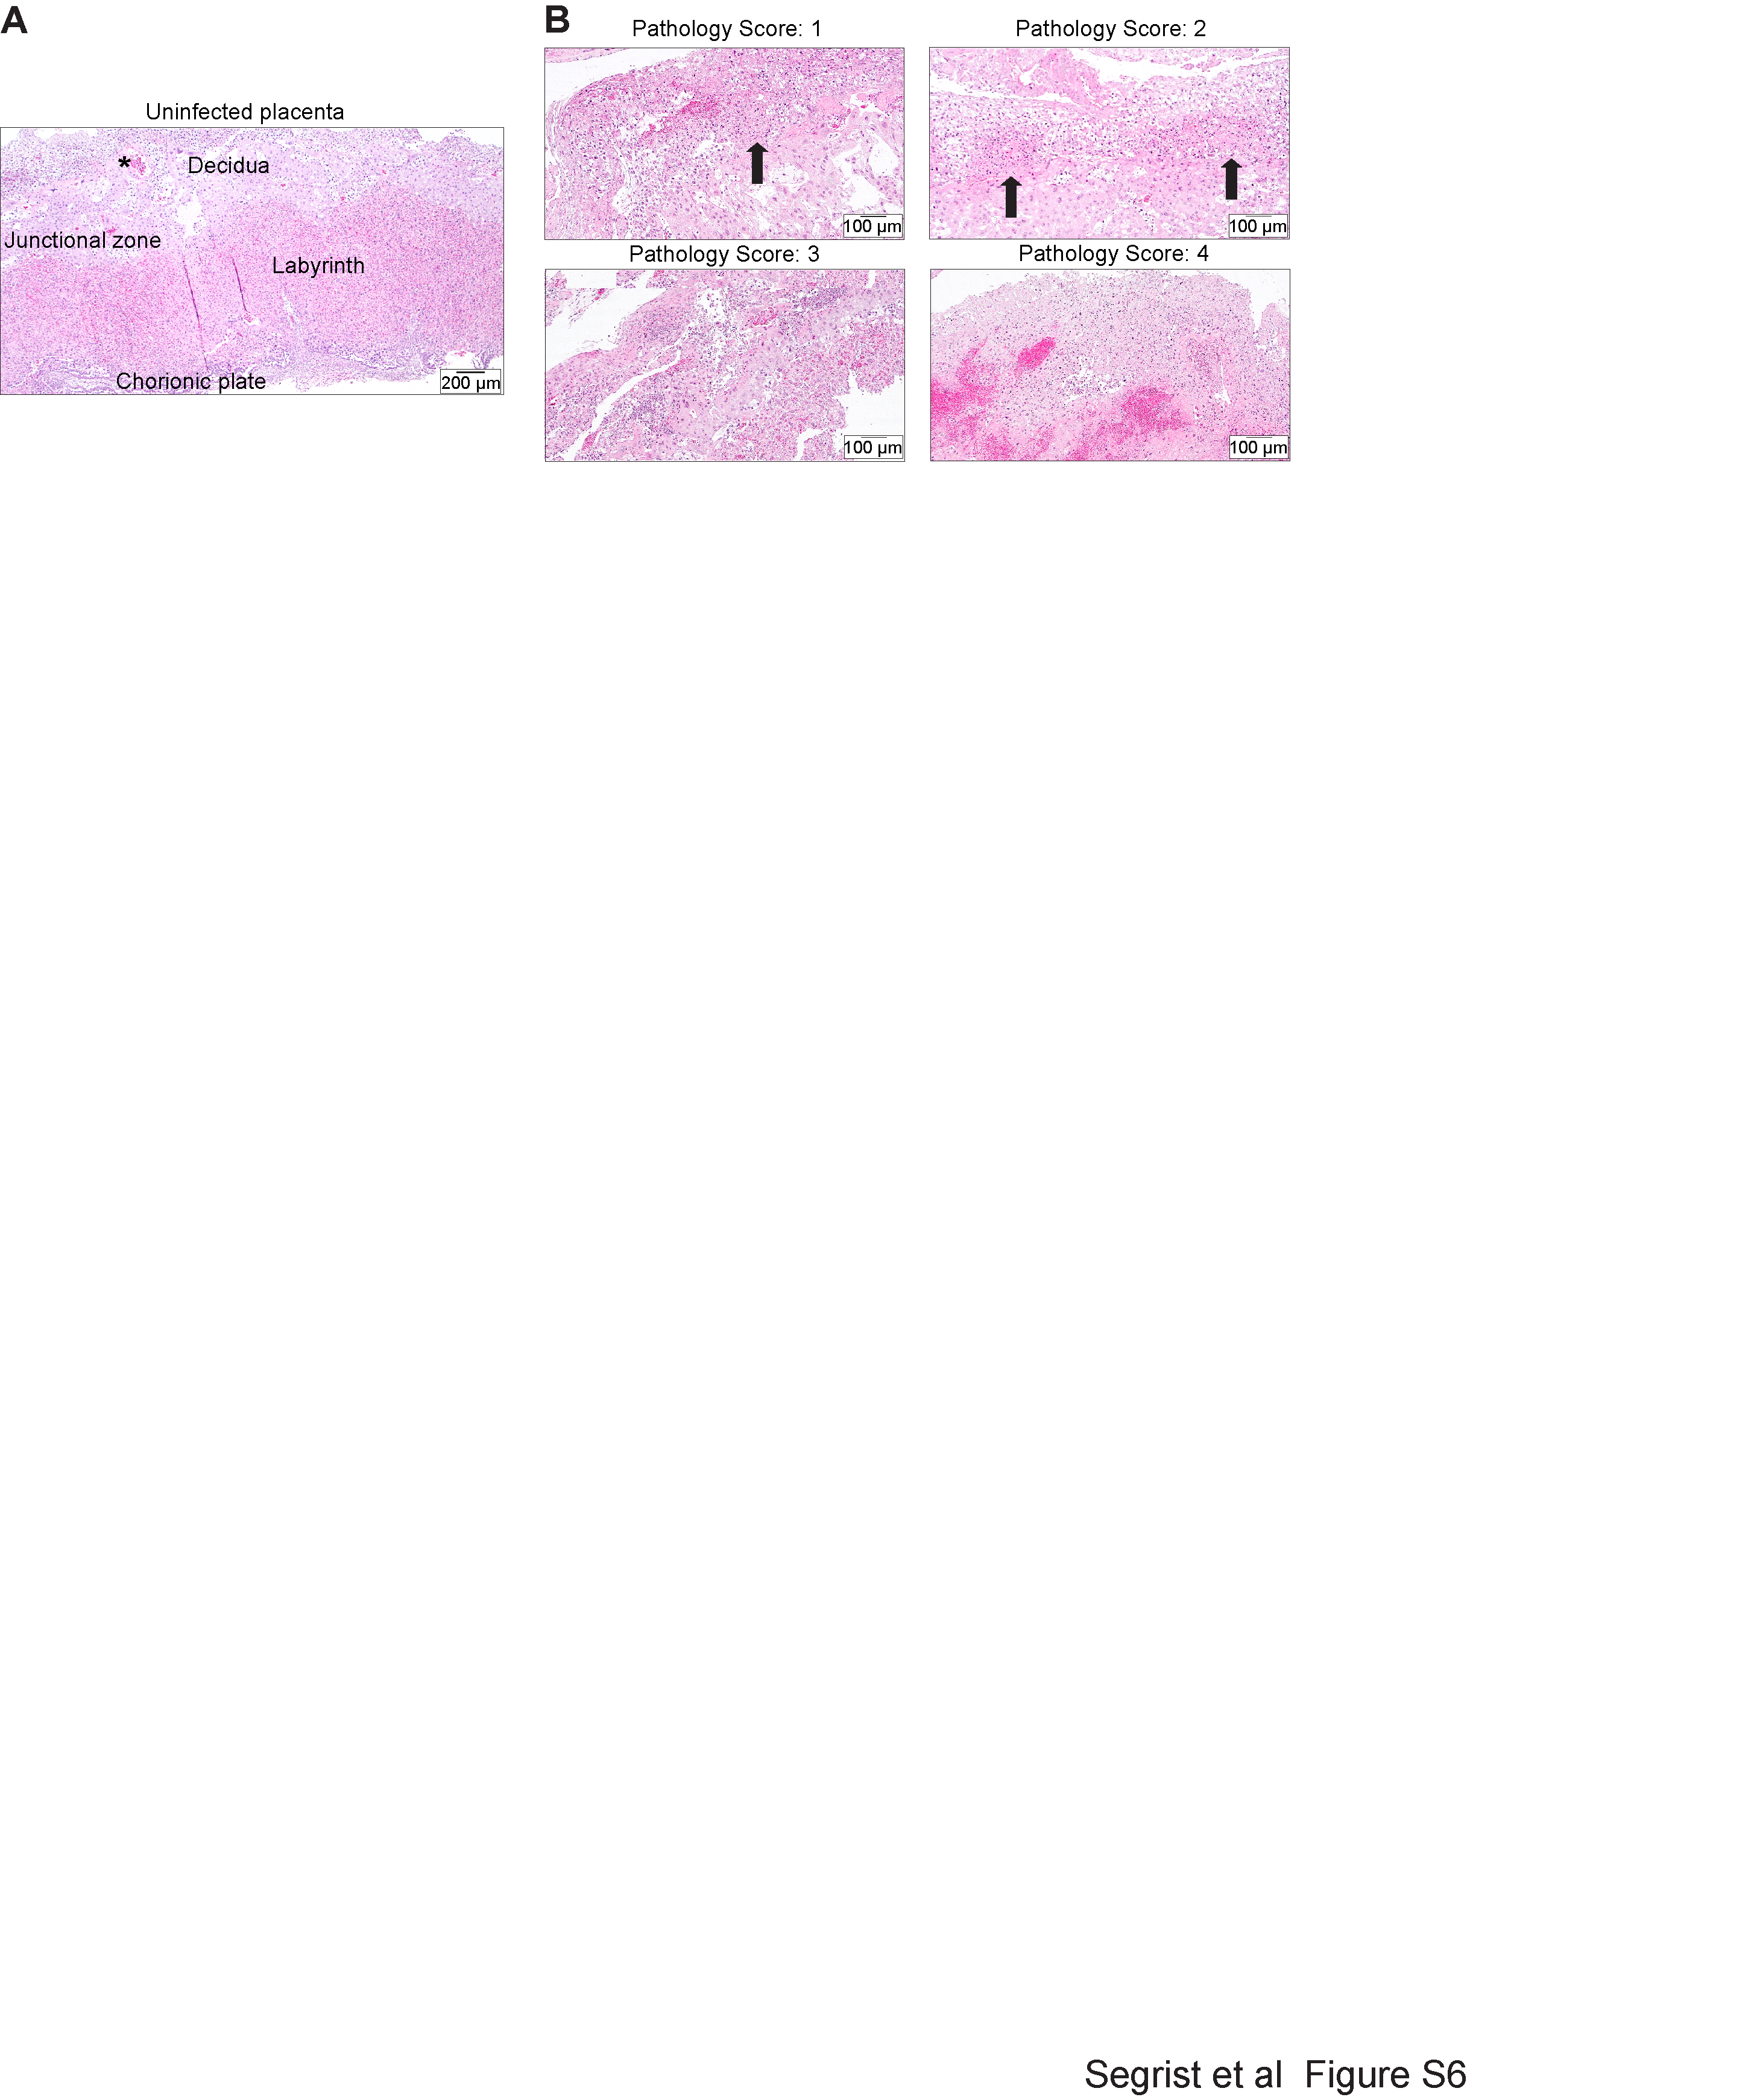
**

**Figure S6. Pathology scoring of decidual necrosis.**

(**A**) Representative H&E image (4x) of an uninfected placenta with no decidual pathology. The decidua is the outer placental layer consisting of large polygonal cells organized in loosely packed cords separated by large maternal vessels and contain anucleated (maternal) erythrocytes (*). The junctional zone, bordering the decidua and separating the labyrinth, consists of glycogen cells and smaller spongiotrophoblasts. The labyrinth rests atop the chorionic villi and consists of interlacing cords and islands of villi separated by tortuous vascular channels with embryonic labyrinthine trophoblast cells. (**B**) Higher magnification (10x) highlighting the decidua along with the corresponding decidual pathology score. Pathology score = 1 (minimal); one well defined focal area of necrosis (black arrow). Pathology score = 2 (mild) a focally extensive area or more than one focus of necrosis (black arrows). Pathology score = 3 (mild to moderate); coalescing foci of necrosis (in this image, significant cellular necrosis is present but vascular necrosis is not a feature). Pathology score = 4 (moderate to severe); extensive and severe necrosis with inflammation, hemorrhage, and congestion that extends into the labyrinth.

**Supplementary Table 1. Hashtag Sequencing information.**

| Samples | Genotype | Sorted Population | HTO | Barcode Sequence |
| --- | --- | --- | --- | --- |
| Mouse 1 | Wild type | (1) EpCam+ CD45-  (2) CD45+ | C301 | ACCCACCAGTAAGAC |
| Mouse 2 | Wild type | (1) EpCam+ CD45-  (2) CD45+ | C302 | GGTCGAGAGCATTCA |
| Mouse 3 | Wild type | (1) EpCam+ CD45-  (2) CD45+ | C303 | CTTGCCGCATGTCAT |
| Mouse 4 | Wild type | (1) EpCam+ CD45-  (2) CD45+ | C304 | AAAGCATTCTTCACG |
| Mouse 5 | IFNLR KO | (1) EpCam+ CD45-  (2) CD45+ | C305 | CTTTGTCTTTGTGAG |
| Mouse 6 | IFNLR KO | (1) EpCam+ CD45-  (2) CD45+ | C306 | TATGCTGCCACGGTA |
| Mouse 7 | IFNLR KO | (1) EpCam+ CD45-  (2) CD45+ | C307 | GAGTCTGCCAGTATC |

**Supplementary Table 2. Cell type specific marker genes.**

| **Cell type** | **Cell type abbreviation** | **Marker** | **Reference** |
| --- | --- | --- | --- |
| Glandular epithelial cell | GE | CXCL15, Foxa2, Prss28, Prss29 | 1, 2, 3 |
| Luminal epithelial cell | LE | Calb1, Tacstd2, EpCam, Lpar3, Prap1, Tmem45b | 2, 3, 4 |
| Mesothelial cell | M | Msln, Upk3b, Lgals7 | 5-7 |
| Fibroblast | F | Dpt, Col15a1,Lsp1, Igfbp3, Aox3, Col1a1, Pdgfra, Osr2 | 8, 9 |
| Endothelial cell | E | Pecam1, Cldn5, Vwf, Lyve1, Mmrn1, Ccl21a, Reln | 8-10 |
| Natural Killer cell | NK | Klra4, Rgs1, Cd7, Nkg7, Gzma, Gzmb, Ccl5, Eomes | 8, 9 |
| Macrophage | Mac | Csf1r, Cd14, C1qa, Adgre1, Lyz2, | 8, 9 ,11 |
| Dendritic cell type 2 | DC2 | H2-Ab1, H2-Eb1, H2-Aa, Cd209a, Clec10a, Sirpa, Irf4, Flt3 | 12 |
| Dendritic cell type 1 | DC1 | Clec9a, Wdfy4, Xcr1, Itgae, Naaa, Irf8, Flt3, Batf3 | 12 |
| T cell | T | Il7r, Cd3e, Cd3d, Il2ra, Cxcr6, Tox | 8, 9 |
| Monocyte | Mo | Ly6c, Cd300a, Adgre1, Lyz2, Ms4a4c | 9 ,11 |

**Supplementary Figure and Table References:**

1. Filant, J., H. Zhou, and T.E. Spencer, *Progesterone inhibits uterine gland development in the neonatal mouse uterus.* Biol Reprod, 2012. **86**(5): p. 146, 1–9.

2. Spencer, T.E., et al., *Single-cell insights into epithelial morphogenesis in the neonatal mouse uterus.* Proc Natl Acad Sci U S A, 2023. **120**(49): p. e2316410120.

3. Filant, J. and T.E. Spencer, *Cell-specific transcriptional profiling reveals candidate mechanisms regulating development and function of uterine epithelia in mice.* Biol Reprod, 2013. **89**(4): p. 86.

4. Xu, Q.X., et al., *Distinguish Characters of Luminal and Glandular Epithelium from Mouse Uterus Using a Novel Enzyme-Based Separation Method.* Reprod Sci, 2023. **30**(6): p. 1867–1877.

5. Rinkevich, Y., et al., *Identification and prospective isolation of a mesothelial precursor lineage giving rise to smooth muscle cells and fibroblasts for mammalian internal organs, and their vasculature.* Nat Cell Biol, 2012. **14**(12): p. 1251–60.

6. Kanamori-Katayama, M., et al., *LRRN4 and UPK3B are markers of primary mesothelial cells.* PLoS One, 2011. **6**(10): p. e25391.

7. Jiang, L., et al., *Single-Cell RNA-Sequencing Reveals Interactions between Endometrial Stromal Cells, Epithelial Cells, and Lymphocytes during Mouse Embryo Implantation.* Int J Mol Sci, 2022. **24**(1).

8. Winkler, I., et al., *The cycling and aging mouse female reproductive tract at single-cell resolution.* Cell, 2024. **187**(4): p. 981–998.e25.

9. Garcia-Flores, V., et al., *A single-cell atlas of murine reproductive tissues during preterm labor.* Cell Reports, 2023. **42**(1): p. 111846.

10. Müller, A.M., et al., *Expression of the endothelial markers PECAM-1, vWf, and CD34 in vivo and in vitro.* Exp Mol Pathol, 2002. **72**(3): p. 221–9.

11. Henlon, Y., et al., *Single-cell analysis identifies distinct macrophage phenotypes associated with prodisease and proresolving functions in the endometriotic niche.* Proc Natl Acad Sci U S A, 2024. **121**(38): p. e2405474121.

12. Brown, C.C., et al., *Transcriptional Basis of Mouse and Human Dendritic Cell Heterogeneity.* Cell, 2019. **179**(4): p. 846–863.e24.
